prevention of infection and also provides an excellent summary of commonly used antibiotics.

Walter's chapter on blood is a short, detailed, well-written discussion of transfusion complications. In addition to descriptions of the various blood components, indications are given for treatment with whole blood divided into four groups depending on age: fresh, 36 hours, 12 days, and old blood.

Kinney's chapter on ventilation and ventilatory failure builds on the overall gas exchange based on ventilation, circulation, and metabolism. The reader is referred to excellent diagrams illustrating dangerous combination of ventilatory capacity reduced to 50 per cent of normal accompanied by raised metabolic demands, increased as much as 30 per cent, making the available reserve dangerously narrow.

Kirklín's chapter on cardiac failure summarizes in a few pages the most common types of cardiac arrhythmias and their treatment with drugs, electronic pacemaking and cardioversion.

MacLean's excellent chapter on shock stresses the importance of resuscitating the patient in hypovolemic shock. MacLean points out the importance of arterial blood lactate determination for prognostic evaluation and emphasizes that lactate elevation is greatest with hypocapnic hypoxia and least with hypercapnic hypoxia. This is in agreement with several recent reports on the dangers involved in alkalemic conditions, often worsened by mechanical hyperventilation.

Power's chapter on renal function and renal failure is very much worth reading. Referring to simple diagrams, he discusses the various syn-

dromes involved. The tests important for diagnosis and treatment of methoxyflurane nephropathy are discussed in surprising detail, because of its importance as one of three conditions associated with high urinary volumes.

The title of the book gives the impression that the authors will spend a significant time on preoperative care. However, relatively little space is assigned to preoperative evaluation and treatment and the importance of preoperative evaluation and preparation of the surgical patients with pulmonary disease is not given the attention it deserves. A chapter on the pre- and postoperative treatment of the patient with chronic obstructive pulmonary disease would have been of particular importance in this manual.

There are surprisingly few printing errors in this book, although the plasma volume (on page 43) is given as 50 instead of 5 per cent of the body weight, and continuous positive-pressure ventilation by mistake is called "CVVP" (page 192). However, repetition is difficult to avoid in a multi-authored book. No less than three authors discuss treatment of cardiac arrhythmias in the chapters on "Circulation and Cardiac Failure," "The Patient in Shock," and "Cardiac Surgery."

Conclusion: This manual covers a wide field and no doubt will fulfill its purpose as a manual for practicing surgeons and surgical residents. It can definitely also be recommended to the practicing anesthesiologist and any physician interested in intensive care.

AKE GREVNIK, M.D.  
University of Pittsburgh  
Pittsburgh, Pennsylvania

### Books Received

A number but not all of these volumes will subsequently be reviewed. It is hoped that this listing will serve as a reference source for anesthesia and related literature—*M.H.H.*

**Fundamentals of Anesthesia Care.** By BETTY J. SMITH. St. Louis, The C. V. Mosby Company, 1972. Pp. 120, illus. \$4.50.

**Anesthesia and Pharmaceutics** (Boerhaave Series for Postgraduate Medical Education). Edited by J. SPIERDIJK AND S. A. FELDMAN. Baltimore, The Williams and Wilkins Company, 1972. Pp. 144, illus. \$20.00.

**Clinical Anesthesia: Management of Patient for Radical Cancer Surgery.** Volume 9/1, first edition. WILLIAM S. HOWLAND AND OLGA SCHWEIZER. Philadelphia, F. A. Davis Company, 1972. Pp. 174, 47 illus. \$10.00.

**Surgery Annual.** Volume 4. Edited by PHILIP COOPER AND LLOYD M. NYHUS. New York, Appleton-Century-Crofts, Educational Division, Meredith Corporation, 1972. Pp. 445, illus. \$17.50.

**Pathophysiology: Altered Regulatory Mechanisms in Disease.** Edited by EDWARD D. FROHLICH. Philadelphia, The J. B. Lippincott Company, 1972. Pp. 795, 145 illus. \$21.00.

**Introduction to Anesthesia: The Principles of Safe Practice.** Fourth edition. By ROBERT D. DRIFFS, JAMES E. ECKENHOFF, AND LEROY D. VANDAM. Philadelphia, W. B. Saunders Company, 1972. Pp. 456, illus. \$11.00.

**Essentials of Cardiac Arrhythmias: Diagnosis and Management.** First edition. By the late SAMUEL BELLET. Philadelphia, W. B. Saunders Company, 1972. Pp. 458, 237 illus. \$15.50.

**Protection et Réanimation: Prévention du Syndrome Reactionnel.** By P. HUGUENARD ET COLLABORATEURS. Paris, Masson & Cie, 1972. Pp. 394, 142 illus. 150F.

**Anaesthetics for Medical Students.** Seventh edition. By GORDON OSTLERNE AND ROGER BRUCE-SMITH. Baltimore, The Williams & Wilkins Company, 1972. Pp. 146. \$3.00.
